# Supplementary material for: Sensitive surfactant-mediated spectrofluorimetric determination of sildenafil
Source: Royal Society of Chemistry journal article supplement (doi:10.1039/b9ay00208a), 2010-01-01

## Electronic supplementary information

Figure 1. Fluorescence emission spectra of sildenafil-HTAB.

$C_{\text{sildenafil}} = 40 \mu\text{g mL}^{-1}$ ; pH 11;  $C_{\text{HTAB}} = 0.0\text{-}1.0 \text{ mM}$ .  $\lambda_{\text{exc}} = 290 \text{ nm}$ ;  $\lambda_{\text{em}} = 435 \text{ nm}$ .

Figure 2. Influence of HTAB concentration on sildenafil fluorescence intensity.

$C_{\text{sildenafil}} = 40 \mu\text{g mL}^{-1}$ ; pH 11;  $C_{\text{HTAB}} = 0.0\text{-}2.0 \text{ mM}$ .  $\lambda_{\text{exc}} = 290 \text{ nm}$ ;  $\lambda_{\text{em}} = 435 \text{ nm}$ .

Figure 3. UV-spectra of sildenafil-SDS system.

Fig. 3a)  $C_{\text{SDS}} = 0 \text{ to } 0.40 \text{ mM}$ ; Fig. 3b)  $C_{\text{SDS}} = 0.40 \text{ to } 8.0 \text{ mM}$ .

$C_{\text{sildenafil}} = 40 \mu\text{g mL}^{-1}$ , pH 5.

Fig. 1

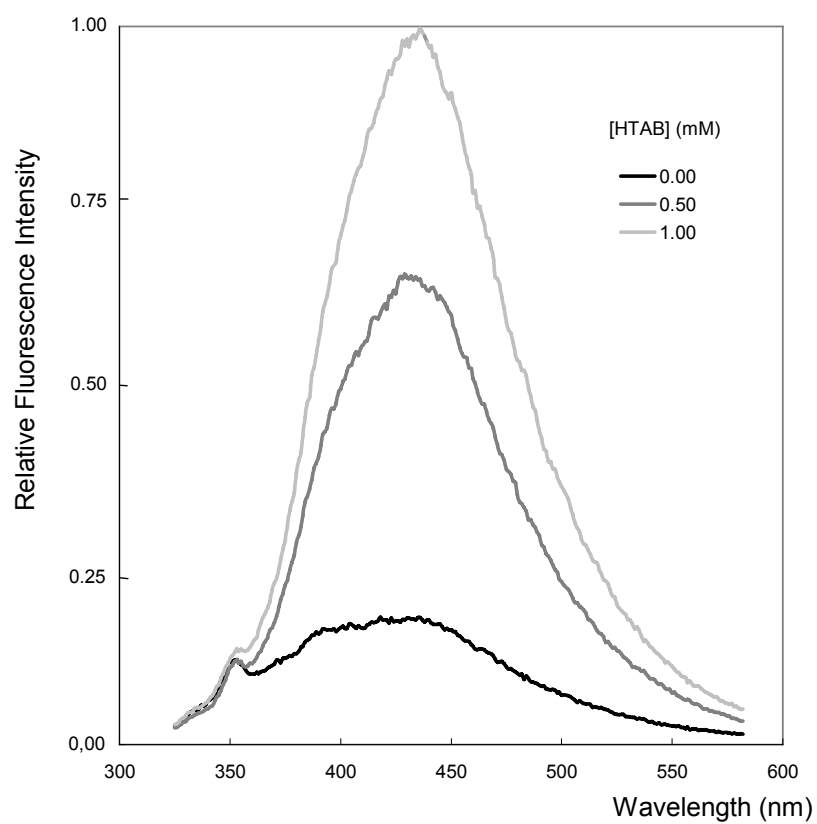

Fig. 2

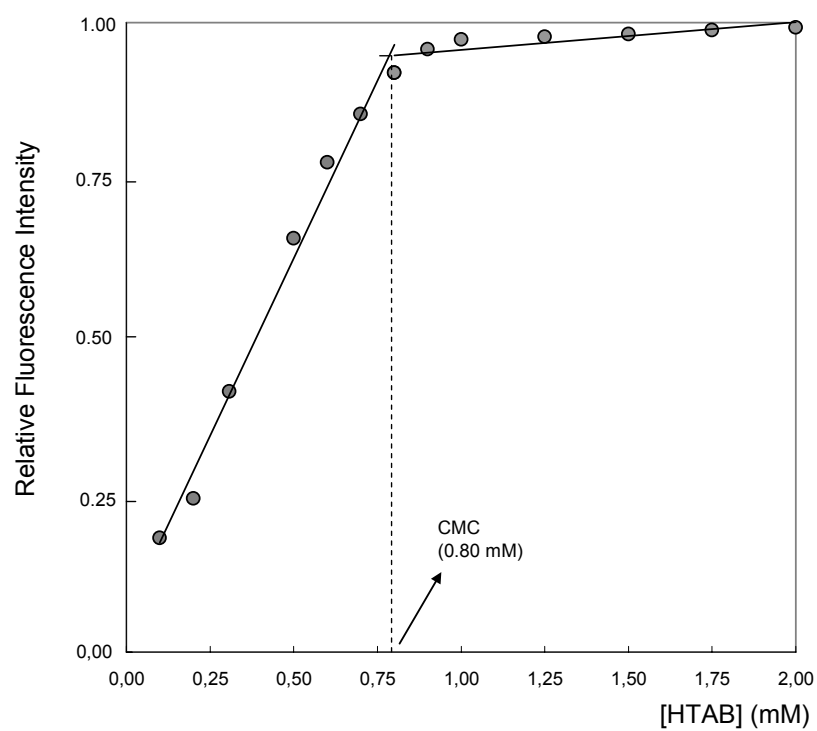

Fig. 3a)

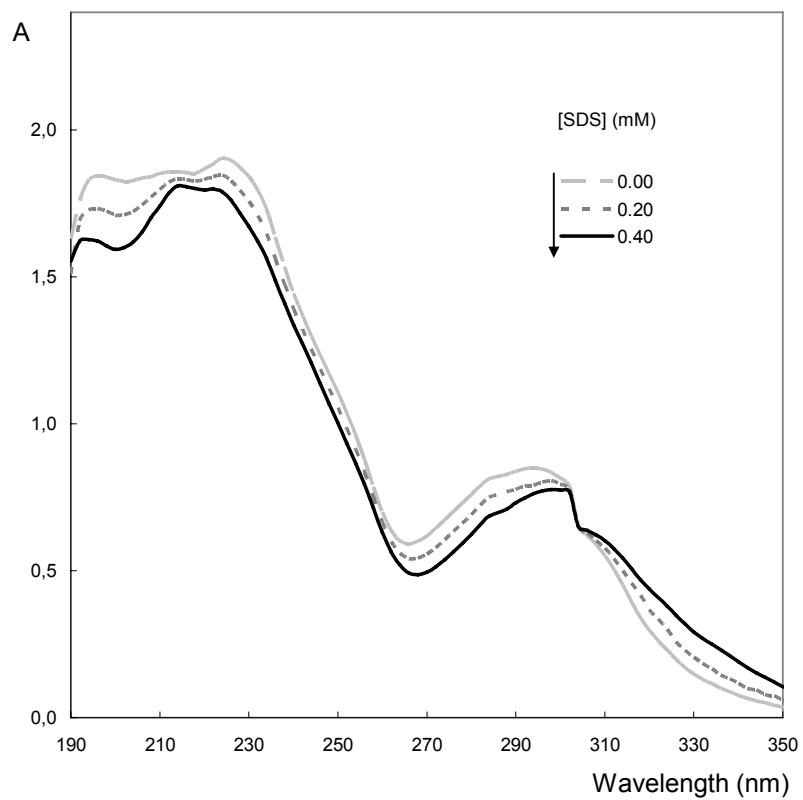

Fig. 3b)

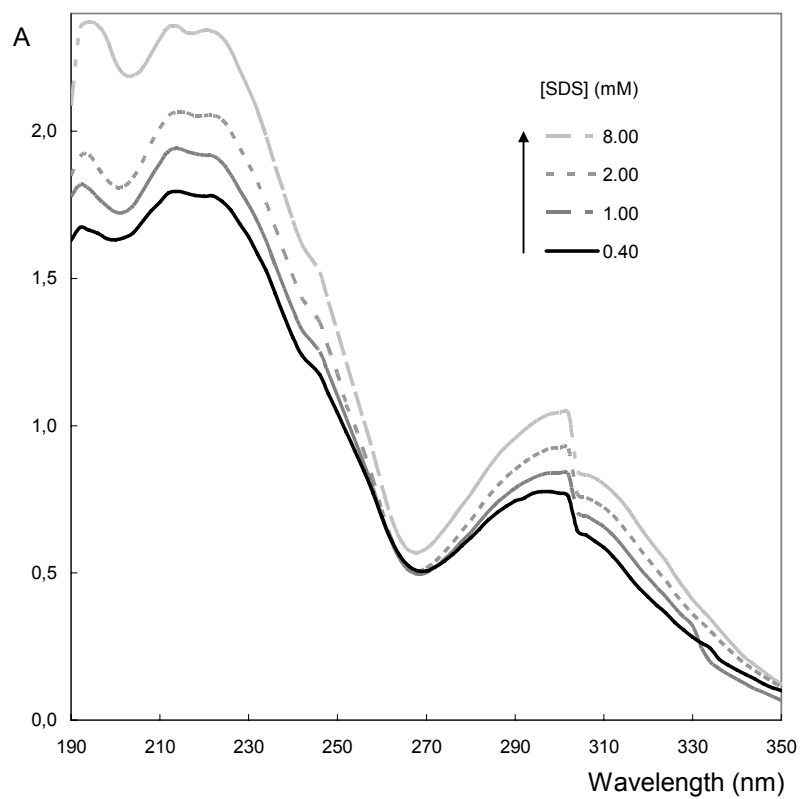

Supplement: b9ay00208a.pdf [file b9ay00208a.pdf]
